# Supplementary material for: Role of additional PCBM layer between ZnO and photoactive layers in inverted bulk-heterojunction solar cells
Source: PubMed Central journal article supplement — Sci Rep. 2014 Mar 7;4:4306. doi: 10.1038/srep04306 (PMC3945486; doi:10.1038/srep04306), 2014-03-07
Supplement: srep04306-s1.pdf [file srep04306-s1.pdf]

## Supporting Information

### Role of additional PCBM layer between ZnO and photoactive layers in inverted bulk-heterojunction solar cells

Shinuk Cho<sup>1,\*</sup>, Kwang-Dae Kim<sup>2</sup>, Jinhee Heo<sup>3</sup>, Joo Yul Lee<sup>3</sup>, Gihoon Cha<sup>3</sup>, Bo Yeol Seo<sup>3</sup>, Young Dok Kim<sup>2,\*</sup>, Yong Soo Kim<sup>1</sup>, Si-young Choi<sup>3</sup>, Dong Chan Lim<sup>3,\*</sup>

<sup>1</sup>Department of Physics and Energy Harvest Storage Research Center (EHSRC), University of Ulsan, Ulsan 680-749, Republic of Korea.

<sup>2</sup>Department of Chemistry, Sungkyunkwan University, Suwon 440-746, Republic of Korea.

<sup>3</sup>Surface Technology Division, Korea Institute of Materials Science (KIMS), Changwon 641-010, Republic of Korea.

\*Corresponding Authors: [sucho@ulsan.ac.kr](mailto:sucho@ulsan.ac.kr) (S. Cho), [ydkim91@skku.edu](mailto:ydkim91@skku.edu) (Y. D. Kim), and [dclim@kims.re.kr](mailto:dclim@kims.re.kr) (D. C. Lim)

#### 1. Absorption Spectra

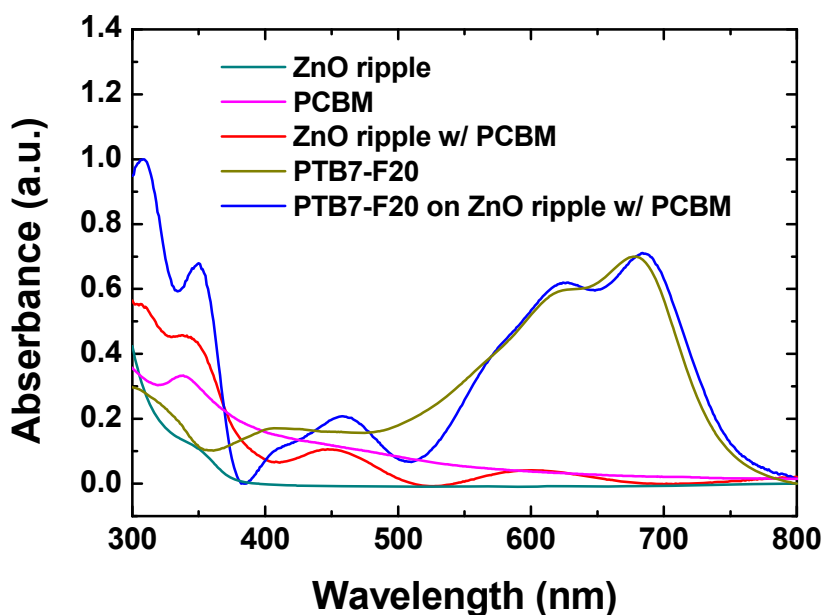

**Figure S1.** Absorption spectra of solar cell components.

We used absorption measurements to verify if the PC<sub>61</sub>BM layer remains after deposition of the photoactive layer. Note that we used pure PTB7-F20 (without PC<sub>71</sub>BM) in this experiment. In the absorption spectrum of the ZnO ripple, there is weak shoulder peak near 350 nm, while PTB7-F20 has no absorption peak at 350 nm. The absorption spectrum measured after spin-coating of PTB7-F20 shows a strong 350 nm peak originating from PC<sub>61</sub>BM. We concluded from this observation that the underlying PC<sub>61</sub>BM layer would remain without problems during the spin-coating of the upper layers. Note that a mixture ratio of greater than 1:2 is necessary to achieve similar absorption features from a mixture of PTB7-F20 and PC<sub>61</sub>BM.

## 2. AFM phase image

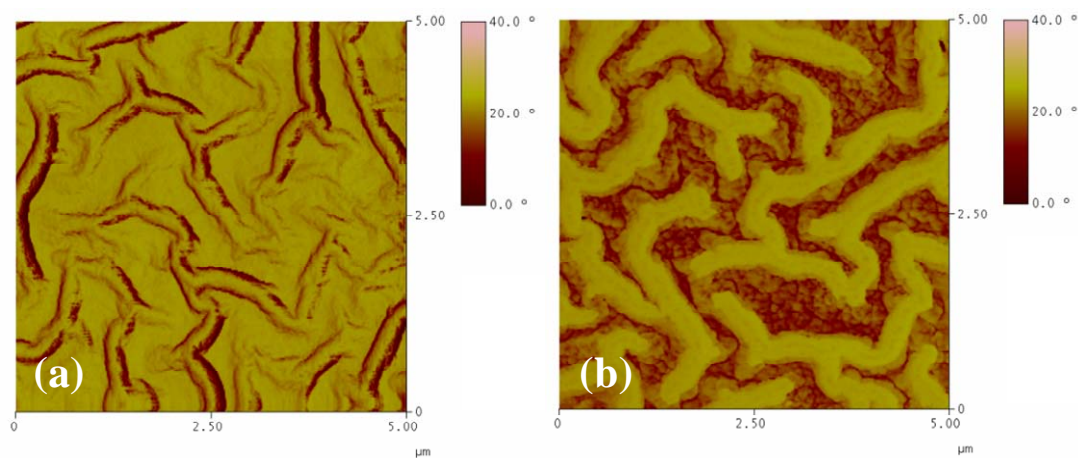

**Figure S2.** AFM phase images of ZnO ripples (a) without and (b) with PC<sub>61</sub>BM.

## 3. Full energy band diagram.

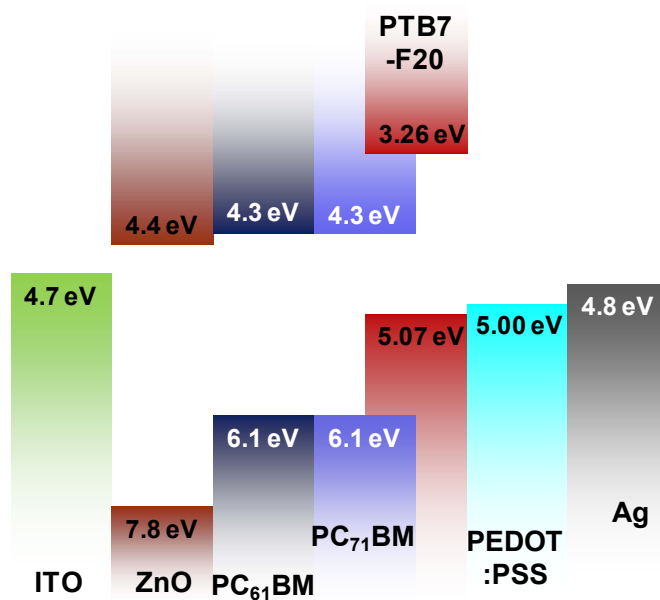

**Figure S3.** Energy band diagram of the inverted BHJ solar cells fabricated using PTB7-F20 and PC<sub>71</sub>BM.

#### 4. Dark current J-V characteristics.

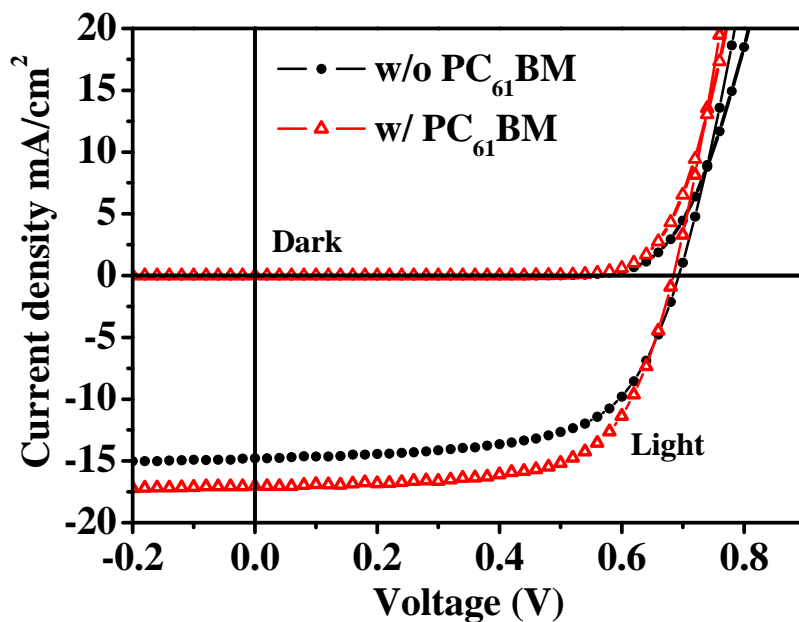

**Figure S4.** J-V characteristic curves measured with and without illumination (labeled “Light” and “Dark,” respectively).

#### 5. Solar cells with non-rippled ZnO layer.

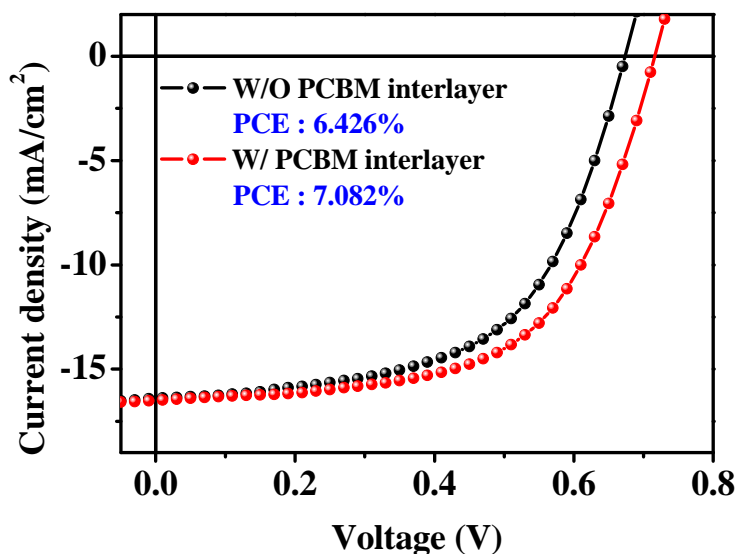

**Figure S5.** J-V characteristics of inverted PTB7-F20:PC<sub>71</sub>BM solar cells with and without PC<sub>61</sub>BM on non-rippled ZnO layer.

## 6. Photo-assisted capacitance-voltage spectroscopy.

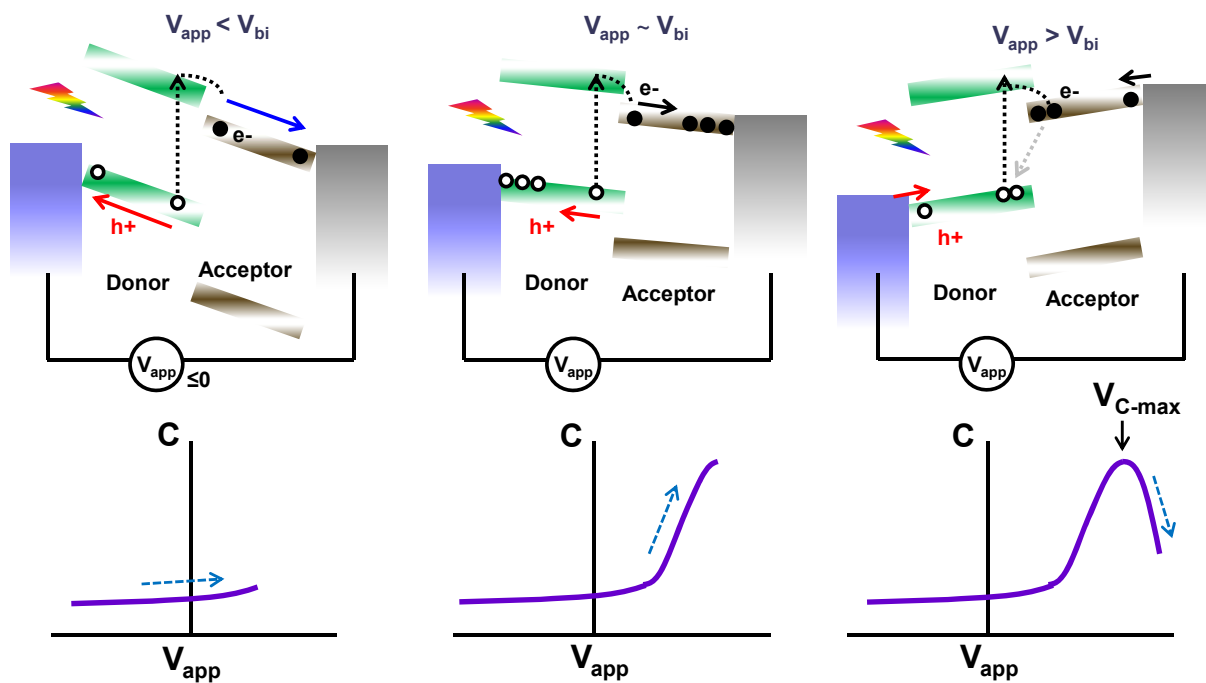

**Figure S6.** Schematic diagrams of photo-assisted capacitance-voltage spectroscopy measurements mechanism.
